# Supplementary material for: Antibacterial Activity of Isobavachalcone (IBC) Is Associated with Membrane Disruption
Source: MDPI journal article supplement (doi:10.3390/membranes12030269), 2022-02-25
Supplement: s1 [file s1]

# **Antibacterial Activity of Isobavachalcone (IBC) is Associated with Membrane Disruption**

Leticia Ribeiro de Assis<sup>1</sup>, Reinaldo dos Santos Theodoro<sup>1</sup>, Maria Beatriz Silva Costa<sup>1</sup>, Julyanna Andrade Silva Nascentes<sup>1</sup>, Miguel Divino da Rocha<sup>1</sup>, Meliza Arantes de Souza Bessa<sup>2</sup>, Ralciane de Paula Menezes<sup>2</sup>, Guilherme Dilarri<sup>3</sup>, Giovane Böerner Hypolito<sup>3</sup>, Vanessa Rodrigues dos Santos<sup>4</sup>, Cristiane Duque<sup>4</sup>, Henrique Ferreira<sup>3</sup>, Carlos Henrique Gomes Martins<sup>2</sup>, Luis Octavio Regasini<sup>1,\*</sup>

<sup>1</sup>Department of Chemistry and Environmental Sciences, Institute of Biosciences, Humanities and Exact Sciences, São Paulo State University (Unesp), São José do Rio Preto 15054-000, SP, Brazil.

<sup>2</sup>Department of Microbiology, Institute of Biomedical Sciences, Federal University of Uberlândia (UFU), Umuarama 38405-320, MG, Brazil.

<sup>3</sup>Department of Biochemistry and Microbiology, Institute of Biosciences, São Paulo State University (Unesp), Rio Claro 130506-900, SP, Brazil.

<sup>4</sup>Department of Preventive and Restorative Dentistry, School of Dentistry, São Paulo State University (Unesp), Araçatuba 16015-050, SP, Brazil

Correspondence: [luis.regasini@unesp.br](mailto:luis.regasini@unesp.br) (LO Regasini)

## SUPPLEMENTARY MATERIAL – Chemical Procedures

### 1. General Procedures

Melting point (mp) was measured using Melt Temperature apparatus MS Tecnozon PFM-II in open capillary tubes. NMR spectra were recorded on Bruker Avance III spectrometer, operating at 600 MHz for  $^1\text{H}$  NMR and 150 MHz for  $^{13}\text{C}$  NMR. Chemical shifts ( $\delta$ ) were referenced to residual non-deuterated solvent signals. Signal multiplicities were reported as singlet (s), and doublet (d). MS spectrum was recorded on Exactive Plus Thermo Scientific Electrospray Mass spectrometer, operating on positive mode. UV-Vis spectra and chromatograms were obtained by High Performance Liquid Chromatography (HPLC) with Photodiode Array Detector (HPLC-PAD) Agilent Technologies<sup>®</sup> 1220 Infinity LC equipment, photodiode array system (Agilent Technologies<sup>®</sup> Model 1260 Infinity) and Agilent Zorbax Eclipse Plus C-18<sup>®</sup> column (250 mm  $\times$  4.6 mm, 5  $\mu\text{m}$ ) using methanol:water (3:1) with 0.5% of acetic acid as mobile phase (1.0 mL/min). Purity of **IBC** was established through area of peak at 372 nm.

### 1.1.Synthesis

#### 2'-hydroxy-4'-(methoxymethoxy)acetophenone (**1a**)

To a mixture of resacetophenone (3 mmol) and anhydrous  $\text{K}_2\text{CO}_3$  (6 mmol) in acetone (10 mL). The methoxymethyl chloride (MOMCl) was added in portions for 30 min [1]. The mixture reaction was stirred for 2 h at room temperature. The reaction medium was extracted with ethyl acetate (3  $\times$  25 mL) and combined organic phases were washed with brine, dried over  $\text{MgSO}_4$ , filtered and evaporated under reduced pressure to give **1a**, with 90% yield.

#### 4-(methoxymethoxy)benzaldehyde (**2**)

To a mixture of 4-hydroxybenzaldehyde (3 mmol) and anhydrous  $K_2CO_3$  (6 mmol) in acetone (10 mL). The methoxymethyl chloride (MOMCl) was added in portions for 30 min [1]. The mixture reaction was stirred for 5 h at room temperature. The reaction medium was extracted with ethyl acetate ( $3 \times 25$  mL), and the combined organic phases were washed with brine, dried over  $MgSO_4$ , filtered and evaporated under reduced pressure to furnish **2**, with 90% yield.

#### **4'-(methoxymethoxy)-2'-prenyloxycetophenone (1b)**

A mixture of **1a** (2.5 mmol) and  $K_2CO_3$  (5 mmol) in acetone (5 mL) was stirred for 15 min at room temperature [1]. Isoprenyl bromide (3 mmol) was added in portions for 30 min and the reaction mixture was stirred for 24 h at room temperature. The reaction medium was extracted with ethyl acetate ( $3 \times 25$  mL) and the combined organic phases were washed with brine, dried over  $MgSO_4$ , filtered and evaporated under reduced pressure, to give 4-methoxymethoxy-2-*O*-prenyloxycetophenone (**1b**) as a yellowish oil with 95% yield.

#### **2'-hydroxy-4'-methoxymethoxy-3'-prenylacetophenone (1c)**

To a stirred solution of **1b** (0.610g, 2.3 mmol) in dry dichloromethane (5 mL) was added montmorillonite K10 (0.610 g) at 0 °C and the reaction medium was stirred for 30 min at room temperature [1]. The reaction mixture was filtered and washed several times with ethyl acetate, which was reduced under vacuum, obtaining a brown oil. This residue was purified over silica gel column chromatography with hexane/ethyl acetate/acetone (9.5:0.25:0.25) to afford **1c** with 35% yield .

#### **2'-hydroxy-4, 4'-Bis(methoxymethoxy)-3'-prenylchalcone (3)**

To an ethanolic solution (3 mL) of **1b** (0.210 g, 0.8 mmol) was added dropwise under stirring an aqueous solution of KOH (60% w/v, 2 mL) at 0 °C [1]. 2-(methoxymethoxy)benzaldehyde (**2**, 0.166 g, 1 mmol) solubilized in EtOH (2 mL) was added to the mixture in portions for 1 h at room temperature. The reaction mixture was stirred for 2 h at room temperature and poured into crushed deionized ice and neutralized with HCl solution (1 mol/L). The mixture reaction was extracted with ethyl acetate (3 × 25 mL), and the organic phases were combined, washed with saturated aqueous NaHSO<sub>3</sub> solution (2 × 10 mL) and brine, dried over MgSO<sub>4</sub>, filtered, and concentrated under reduced pressure, furnishing chalcone **3** as a yellow oil, with 60% yield.

**(E)-1-(2,4-dihydroxy-3-(3-methylbut-2-en-1-yl)phenyl)-3-(4-hydroxyphenyl)prop-2-en-1-one (IBC)**

To a stirred solution of MOM-protected chalcone **3** (0.6 mmol, 0.264g) in 3 mL of MeOH:THF (1:1) was added 2 mL of HCl aqueous solution (1 mol/L) at 0 °C [1]. The reaction mixture was stirred at 55 °C for 6 h and poured into crushed deionized ice, filtered and the crude yellow powder was purified over silica gel column chromatography with hexane/ethyl acetate to afford **IBC**, with yield of 60%.

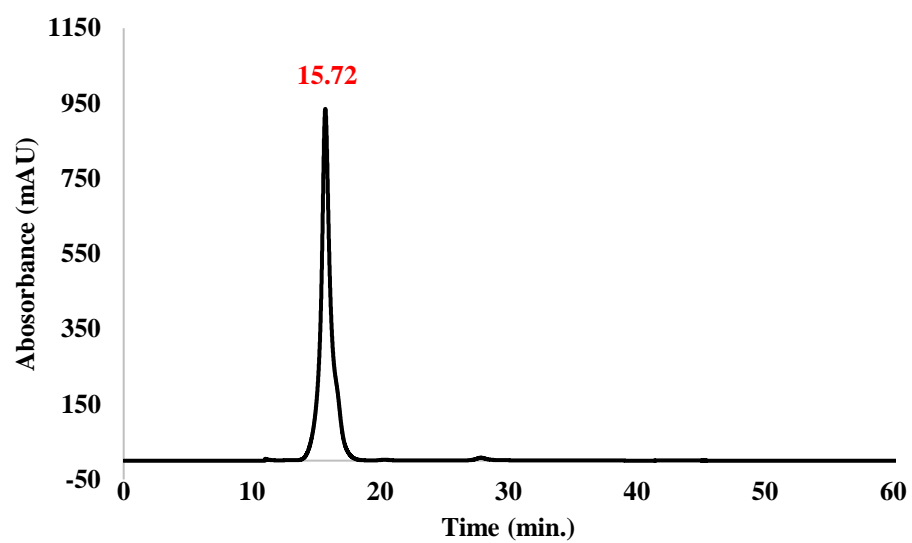

**Figure S1.** HPLC-PAD chromatogram of **IBC**. Methanol:Water (3:1), 372 nm

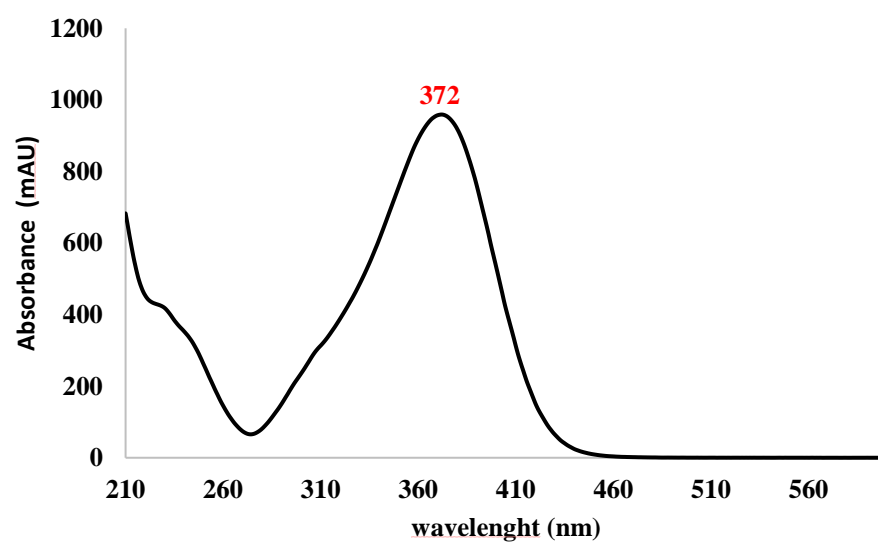

**Figure S2.** UV-Vis spectra of **IBC**

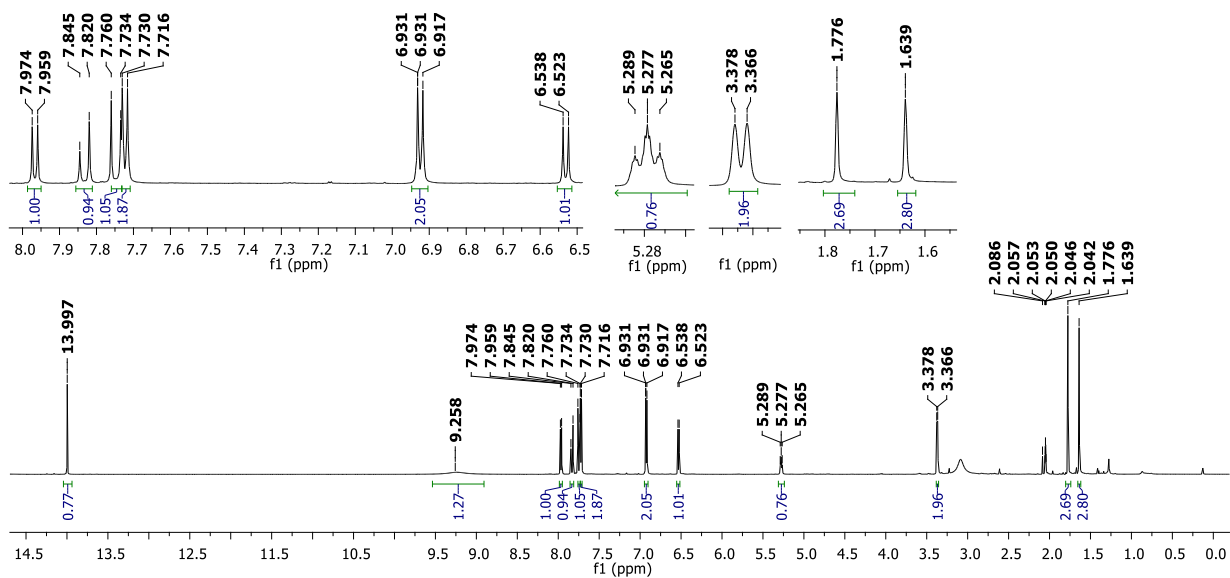

**Figure S3.  $^1\text{H}$  NMR spectrum of IBC (acetone- $d_6$ ; 600 MHz)**

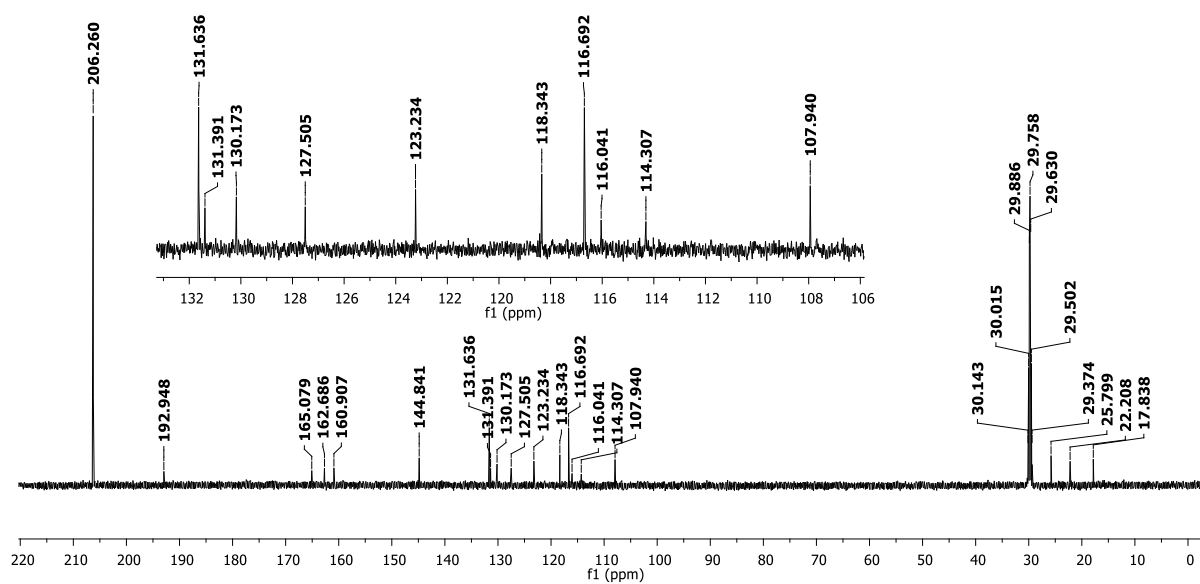

**Figure S4.  $^{13}\text{C}$  NMR spectrum of IBC (acetone- $d_6$ ; 150 MHz)**

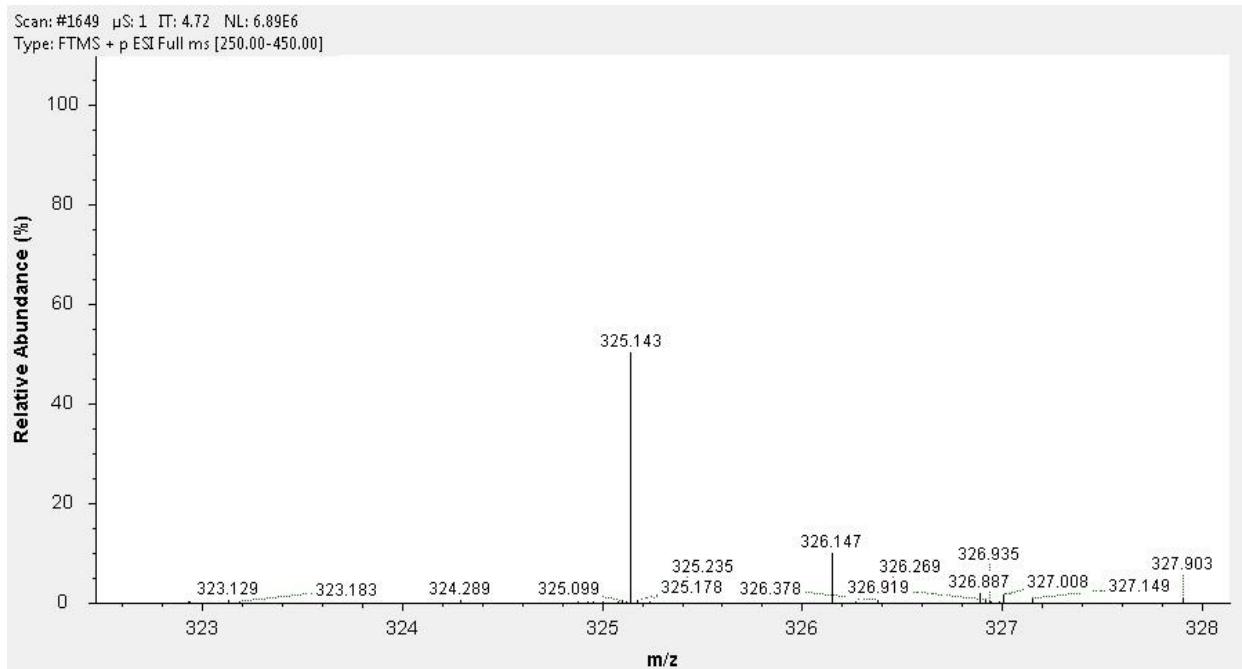

**Figure S5.** Mass spectrum (MS) of **IBC** (electrospray, positive mode)

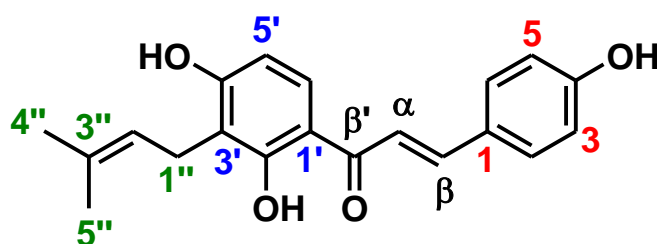

Yellow powder; HPLC purity: 99 %; m.p. literature: 156.8–157.8 °C.[1], m.p. found: 134–137°C.  $^1\text{H}$  NMR (600 MHz, acetone- $d_6$ ) according to literature [2]:  $\delta$  1.64 (s, H-5''), 1.78 (s, H-4''), 3.37 (d,  $J = 7.2$  Hz, H-1''), 5.28 (t,  $J = 7.2$  Hz, H-2''), 6.53 (d,  $J = 8.8$  Hz, H-5'), 6.92 (d,  $J = 8.6$  Hz, H-3 and H-5), 7.72 (d,  $J = 8.6$  Hz, H-2 and H-6), 7.75 (d,  $J = 15.4$  Hz, H- $\alpha$ ), 7.83 (d,  $J = 15.3$  Hz, H- $\beta$ ), 7.97 (d,  $J = 8.9$  Hz, H-6'), 9.26 (brs, 4'-OH), 14.0 (s, 2'-OH).  $^{13}\text{C}$  NMR (150 MHz, acetone- $d_6$ ):  $\delta$  17.84 (C-5''), 22.20 (C-1''), 25.80 (C-4''), 107.9 (C-5'), 114.3 (C-1'), 116.0 (C-3'), 116.7 (C-3 and C-5), 118.3 (C- $\alpha$ ), 123.2 (C-2''), 127.5 (C-1), 130.2 (C-6'), 131.4 (C-3''), 131.6 (C-2 and C-6), 144.8 (C- $\beta$ ), 160.9 (C-4), 162.7 (C-2'), 165.1 (C-4'), 192.9 (C- $\beta'$ ). UV/Vis  $\lambda_{\text{max}}$  (MeOH): 372 nm. MS (Mwt: 324.136):  $m/z$  325.143 (M+1) (base peak).

- [1] Sugamoto K, Matsusita YI, Matsui K, Kurogi C, Matsui T. Synthesis and antibacterial activity of chalcones bearing prenyl or geranyl groups from *Angelica keiskei*. **Tetrahedron**; 2011;67:5346–59. doi: 10.1016/j.tet.2011.04.104
- [2] Wang HM, Zhang L, Liu J, Yang ZL, Zhao HY, Yang Y, et al. Synthesis and anti-cancer activity evaluation of novel prenylated and geranylated chalcone natural products and their analogs. **Eur J Med Chem.**; 2015;92:439–48. doi: 10.1016/j.ejmech.2015.01.007
